# Supplementary material for: A series of Ln4III clusters: Dy4 single molecule magnet and Tb4 multi-responsive luminescent sensor for Fe3+, CrO42−/Cr2O72− and 4-nitroaniline
Source: Royal Society of Chemistry journal article supplement (doi:10.1039/c8ra01485j), 2018-01-01
Supplement: c8ra01485j1.pdf [file c8ra01485j1.pdf]

# A series of Ln<sup>III</sup><sub>4</sub> clusters: Dy<sub>4</sub> single molecule magnet and Tb<sub>4</sub> multi-responsive luminescent sensor for Fe<sup>3+</sup>, CrO<sub>4</sub><sup>2-</sup>/Cr<sub>2</sub>O<sub>7</sub><sup>2-</sup> 4-nitroaniline

Yaru Qin, Yu Ge, Shasha Zhang, Hao Sun, Yu Jing, Yahong Li\* and Wei Liu

College of Chemistry, Chemical Engineering and Materials Science, Soochow University, Suzhou 215123, China.

E-mail: [liyahong@suda.edu.cn](mailto:liyahong@suda.edu.cn)

## Content

|                                                                                                                                                                                                      |    |
|------------------------------------------------------------------------------------------------------------------------------------------------------------------------------------------------------|----|
| <b>Fig. S1-S3</b> <sup>1</sup> H, <sup>13</sup> C NMR and IR spectra of H <sub>2</sub> L.....                                                                                                        | 2  |
| <b>Table S1</b> Selected bond lengths and angles for <b>1-5</b> .....                                                                                                                                | 3  |
| <b>Fig. S4</b> PXRD patterns for <b>1-5</b> .....                                                                                                                                                    | 6  |
| <b>Fig. S5</b> IR spectra of <b>1-5</b> .....                                                                                                                                                        | 7  |
| <b>Table S2</b> Results of Continuous Shape Measures (SHAPE) calculation.....                                                                                                                        | 8  |
| <b>Fig. S6</b> The Curie-Weiss law fit of <b>1</b> .....                                                                                                                                             | 9  |
| <b>Fig. S7</b> Temperature dependence of the out-of-phase (χ'') ac susceptibility for <b>3</b> .....                                                                                                 | 9  |
| <b>Fig. S8</b> The excitation and emission spectra of H <sub>2</sub> L and emission spectra of <b>1-5</b> in solid state.....                                                                        | 9  |
| <b>Fig. S9</b> Excitation spectrum and emission spectrum of <b>2</b> in solid state.....                                                                                                             | 10 |
| <b>Fig. S10-S11</b> PXRD patterns of <b>2</b> for pH and stability experiments.....                                                                                                                  | 10 |
| <b>Fig. S12</b> SEM images and particle size distribution of <b>2</b> .....                                                                                                                          | 11 |
| <b>Fig. S13</b> Plots of I <sub>0</sub> /I-1 and fluorescence intensity of <b>2</b> versus low concentration of Fe <sup>3+</sup> .....                                                               | 11 |
| <b>Fig. S14</b> The XPS spectra of <b>2</b> and <b>2-Fe<sup>3+</sup></b> .....                                                                                                                       | 12 |
| <b>Fig. S15</b> PXRD patterns for <b>2</b> after the detection of Fe <sup>3+</sup> , CrO <sub>4</sub> <sup>2-</sup> and Cr <sub>2</sub> O <sub>7</sub> <sup>2-</sup> .....                           | 12 |
| <b>Fig. S16</b> Luminescent responses of <b>2</b> towards different concentrations of CrO <sub>4</sub> <sup>2-</sup> and Cr <sub>2</sub> O <sub>7</sub> <sup>2-</sup> , respectively.....            | 12 |
| <b>Fig. S17</b> Plot of I <sub>0</sub> /I-1 and fluorescence intensity of <b>2</b> versus low concentration of CrO <sub>4</sub> <sup>2-</sup> and Cr <sub>2</sub> O <sub>7</sub> <sup>2-</sup> ..... | 13 |
| <b>Fig. S18</b> Luminescent responses of <b>2</b> towards different concentrations of 4-NA.....                                                                                                      | 13 |
| <b>Fig. S19</b> Plot of I <sub>0</sub> /I-1 and fluorescence intensity of <b>2</b> for 4-NA in low concentration region.....                                                                         | 14 |

**Fig. S20** PXRD patterns of **2** for free and 4-NA ethanol stability experiments.....14

**Table S3** Comparison of various Ln-complexes fluorescent sensors for  $\text{Fe}^{3+}$ ,  $\text{CrO}_4^{2-}$  and  $\text{Cr}_2\text{O}_7^{2-}$  .....14

**Table S4** Comparison of various complexes fluorescent sensors for 4-NA.....15

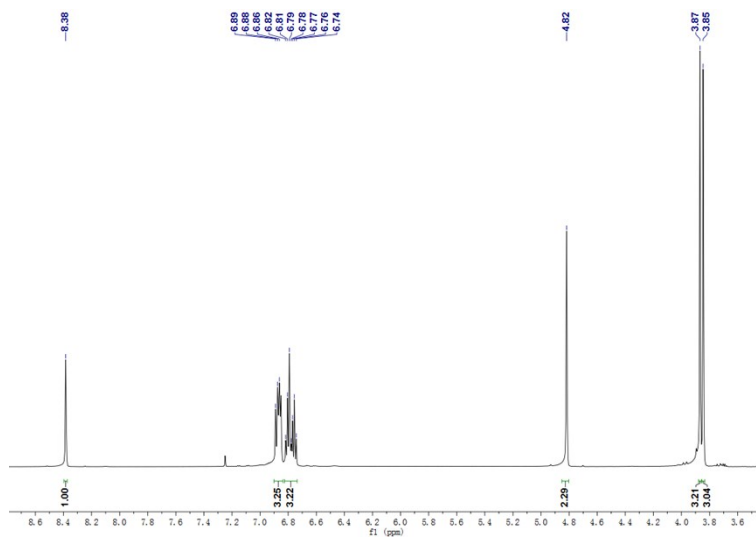

**Fig. S1**  $^1\text{H}$  NMR spectrum of  $\text{H}_2\text{L}$ .

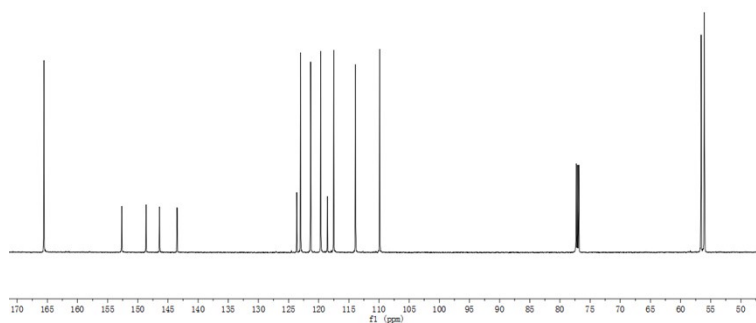

**Fig. S2**  $^{13}\text{C}$  NMR spectrum of  $\text{H}_2\text{L}$ .

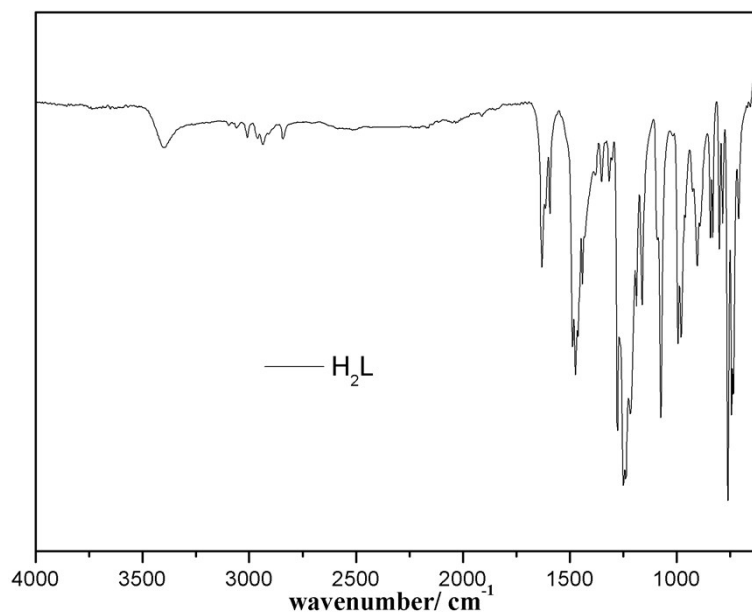

Fig. S3 FT-IR spectrum of H<sub>2</sub>L.

Table S1 The selected bond length (Å) and angle (°) for 1-5

| 1            | Length/Å        | 2            | Length/Å        | 3            | Length/Å        |
|--------------|-----------------|--------------|-----------------|--------------|-----------------|
| Gd(1)-O(1)   | 2.310(3)        | Tb(1)-O(1)   | 2.293(2)        | Dy(1)-O(1)   | 2.293(2)        |
| Gd(1)-O(3)   | 2.202(3)        | Tb(1)-O(3)   | 2.181(2)        | Dy(1)-O(3)   | 2.169(3)        |
| Gd(1)-O(5)   | 2.451(3)        | Tb(1)-O(5)   | 2.427(2)        | Dy(1)-O(5)   | 2.405(2)        |
| Gd(1)-O(6)   | 2.444(3)        | Tb(1)-O(6)   | 2.435(2)        | Dy(1)-O(6)   | 2.429(3)        |
| Gd(1)-O(10)  | 2.368(3)        | Tb(1)-O(10)  | 2.358(2)        | Dy(1)-O(10)  | 2.355(3)        |
| Gd(1)-O(11)  | 2.548(4)        | Tb(1)-O(11)  | 2.533(3)        | Dy(1)-O(11)  | 2.534(3)        |
| Gd(1)-O(12)  | 2.478(4)        | Tb(1)-O(12)  | 2.474(3)        | Dy(1)-O(12)  | 2.455(3)        |
| Gd(1)-N(1)   | 2.509(4)        | Tb(1)-N(1)   | 2.495(3)        | Dy(1)-N(1)   | 2.491(3)        |
| Gd(2)-O(1)   | 2.332(3)        | Tb(2)-O(1)   | 2.314(2)        | Dy(2)-O(1)   | 2.298(2)        |
| Gd(2)-O(2)   | 2.586(3)        | Tb(2)-O(2)   | 2.578(2)        | Dy(2)-O(2)   | 2.575(3)        |
| Gd(2)-O(5)   | 2.391(3)        | Tb(2)-O(5)   | 2.379(2)        | Dy(2)-O(5)   | 2.378(2)        |
| Gd(2)-O(7)   | 2.305(3)        | Tb(2)-O(7)   | 2.289(2)        | Dy(2)-O(7)#1 | 2.303(2)        |
| Gd(2)-O(7)#1 | 2.332(3)        | Tb(2)-O(7)#1 | 2.312(2)        | Dy(2)-O(7)   | 2.281(2)        |
| Gd(2)-O(8)#1 | 2.634(4)        | Tb(2)-O(8)#1 | 2.640(3)        | Dy(2)-O(8)#1 | 2.635(3)        |
| Gd(2)-O(9)   | 2.280(3)        | Tb(2)-O(9)   | 2.258(2)        | Dy(2)-O(9)   | 2.249(3)        |
| Gd(2)-N(2)   | 2.479(5)        | Tb(2)-N(2)   | 2.450(3)        | Dy(2)-N(2)   | 2.443(3)        |
| <b>4</b>     | <b>Length/Å</b> | <b>4</b>     | <b>Length/Å</b> | <b>4</b>     | <b>Length/Å</b> |
| Ho(1)-O(1)   | 2.276(3)        | Ho(1)-O(6)   | 2.408(3)        | Ho(1)-O(12)  | 2.430(3)        |
| Ho(1)-O(3)   | 2.167(3)        | Ho(1)-O(10)  | 2.334(3)        | Ho(1)-N(1)   | 2.472(4)        |
| Ho(1)-O(5)   | 2.393(3)        | Ho(1)-O(11)  | 2.519(3)        | Ho(2)-O(1)   | 2.285(3)        |
| Ho(2)-O(2)   | 2.568(3)        | Ho(2)-O(5)   | 2.359(3)        | Ho(2)-O(7)   | 2.268(3)        |
| Ho(2)-O(7)#1 | 2.289(3)        | Ho(2)-O(8)#1 | 2.618(3)        | Ho(2)-O(9)   | 2.234(3)        |
| Ho(2)-N(2)   | 2.429(4)        |              |                 |              |                 |
| <b>5</b>     | <b>Length/Å</b> | <b>5</b>     | <b>Length/Å</b> | <b>5</b>     | <b>Length/Å</b> |
| Er(1)-O(1)   | 2.264(3)        | Er(1)-O(10)  | 2.328(3)        | Er(2)-O(1)   | 2.276(3)        |
| Er(2)-O(7)#1 | 2.277(3)        | Er(1)-O(3)   | 2.160(3)        | Er(1)-O(11)  | 2.519(3)        |

|                   |                |                   |                |                   |                |
|-------------------|----------------|-------------------|----------------|-------------------|----------------|
| Er(2)-O(2)        | 2.572(3)       | Er(2)-O(8)#1      | 2.614(3)       | Er(1)-O(5)        | 2.389(3)       |
| Er(1)-O(12)       | 2.417(3)       | Er(2)-O(5)        | 2.344(3)       | Er(2)-O(9)        | 2.224(3)       |
| Er(1)-O(6)        | 2.400(3)       | Er(1)-N(1)        | 2.457(3)       | Er(2)-O(7)        | 2.262(3)       |
| Er(2)-N(2)        | 2.424(4)       |                   |                |                   |                |
| <b>1</b>          | <b>Angle/°</b> | <b>2</b>          | <b>Angle/°</b> | <b>3</b>          | <b>Angle/°</b> |
| O(1)-Gd(1)-O(5)   | 73.48(11)      | O(1)-Tb(1)-O(5)   | 73.05(8)       | O(1)-Dy(1)-O(5)   | 72.91(8)       |
| O(1)-Gd(1)-O(6)   | 138.17(12)     | O(1)-Tb(1)-O(6)   | 138.35(8)      | O(1)-Dy(1)-O(6)   | 138.57(9)      |
| O(1)-Gd(1)-O(10)  | 84.17(12)      | O(1)-Tb(1)-O(10)  | 84.30(9)       | O(1)-Dy(1)-O(10)  | 84.34(9)       |
| O(1)-Gd(1)-O(11)  | 134.50(12)     | O(1)-Tb(1)-O(11)  | 134.22(9)      | O(1)-Dy(1)-O(11)  | 134.32(9)      |
| O(1)-Gd(1)-O(12)  | 87.23(12)      | O(1)-Tb(1)-O(12)  | 86.97(9)       | O(1)-Dy(1)-O(12)  | 87.05(9)       |
| O(1)-Gd(1)-N(1)   | 75.32(13)      | O(1)-Tb(1)-N(1)   | 75.49(9)       | O(1)-Dy(1)-N(1)   | 75.46(10)      |
| O(3)-Gd(1)-O(1)   | 127.73(12)     | O(3)-Tb(1)-O(1)   | 128.40(9)      | O(3)-Dy(1)-O(1)   | 127.96(10)     |
| O(3)-Gd(1)-O(5)   | 146.01(12)     | O(3)-Tb(1)-O(5)   | 146.15(9)      | O(3)-Dy(1)-O(5)   | 146.22(9)      |
| O(3)-Gd(1)-O(6)   | 85.60(12)      | O(3)-Tb(1)-O(6)   | 84.91(9)       | O(3)-Dy(1)-O(6)   | 85.07(9)       |
| O(3)-Gd(1)-O(10)  | 79.87(13)      | O(3)-Tb(1)-O(10)  | 80.12(9)       | O(3)-Dy(1)-O(10)  | 79.57(9)       |
| O(3)-Gd(1)-O(11)  | 76.43(13)      | O(3)-Tb(1)-O(11)  | 75.97(9)       | O(3)-Dy(1)-O(11)  | 76.19(10)      |
| O(3)-Gd(1)-O(12)  | 122.70(13)     | O(3)-Tb(1)-O(12)  | 122.75(9)      | O(3)-Dy(1)-O(12)  | 123.41(10)     |
| O(3)-Gd(1)-N(1)   | 72.92(13)      | O(3)-Tb(1)-N(1)   | 73.50(9)       | O(3)-Dy(1)-N(1)   | 73.68(10)      |
| O(5)-Gd(1)-O(11)  | 108.61(12)     | O(5)-Tb(1)-O(6)   | 66.47(8)       | O(5)-Dy(1)-O(6)   | 66.78(8)       |
| O(5)-Gd(1)-O(12)  | 79.59(12)      | O(5)-Tb(1)-O(11)  | 108.89(9)      | O(5)-Dy(1)-O(11)  | 109.29(9)      |
| O(5)-Gd(1)-N(1)   | 140.90(12)     | O(5)-Tb(1)-O(12)  | 79.06(9)       | O(5)-Dy(1)-O(12)  | 78.73(9)       |
| O(6)-Gd(1)-O(5)   | 65.86(11)      | O(5)-Tb(1)-N(1)   | 140.25(9)      | O(5)-Dy(1)-N(1)   | 139.97(9)      |
| O(6)-Gd(1)-O(11)  | 70.75(12)      | O(6)-Tb(1)-O(11)  | 70.90(9)       | O(6)-Dy(1)-O(11)  | 70.75(9)       |
| O(6)-Gd(1)-O(12)  | 94.58(13)      | O(6)-Tb(1)-O(12)  | 94.52(9)       | O(6)-Dy(1)-O(12)  | 94.05(10)      |
| O(6)-Gd(1)-N(1)   | 145.51(13)     | O(6)-Tb(1)-N(1)   | 145.02(9)      | O(6)-Dy(1)-N(1)   | 144.74(10)     |
| O(10)-Gd(1)-O(5)  | 76.27(12)      | O(10)-Tb(1)-O(5)  | 76.35(8)       | O(10)-Dy(1)-O(5)  | 76.52(9)       |
| O(10)-Gd(1)-O(6)  | 77.31(12)      | O(10)-Tb(1)-O(6)  | 77.25(9)       | O(10)-Dy(1)-O(6)  | 77.57(9)       |
| O(10)-Gd(1)-O(11) | 141.26(12)     | O(10)-Tb(1)-O(11) | 141.42(9)      | O(10)-Dy(1)-O(11) | 141.31(9)      |
| O(10)-Gd(1)-O(12) | 155.79(13)     | O(10)-Tb(1)-O(12) | 155.35(9)      | O(10)-Dy(1)-O(12) | 155.21(9)      |
| O(10)-Gd(1)-N(1)  | 123.11(13)     | O(10)-Tb(1)-N(1)  | 123.88(9)      | O(10)-Dy(1)-N(1)  | 123.94(10)     |
| O(12)-Gd(1)-O(11) | 50.58(12)      | O(12)-Tb(1)-O(11) | 50.74(9)       | O(12)-Dy(1)-O(11) | 51.01(9)       |
| O(12)-Gd(1)-N(1)  | 75.94(13)      | O(12)-Tb(1)-N(1)  | 75.59(9)       | O(12)-Dy(1)-N(1)  | 75.73(10)      |
| N(1)-Gd(1)-O(11)  | 78.03(13)      | N(1)-Tb(1)-O(11)  | 77.25(9)       | N(1)-Dy(1)-O(11)  | 76.95(10)      |
| O(1)-Gd(2)-O(2)   | 64.51(11)      | O(1)-Tb(2)-O(2)   | 64.85(8)       | O(1)-Dy(2)-O(2)   | 65.13(9)       |
| O(1)-Gd(2)-O(5)   | 74.22(11)      | O(1)-Tb(2)-O(5)   | 73.58(8)       | O(1)-Dy(2)-O(5)   | 73.33(8)       |
| O(1)-Gd(2)-O(7)#1 | 89.14(12)      | O(1)-Tb(2)-O(8)#1 | 76.58(8)       | O(1)-Dy(2)-O(7)#1 | 88.98(9)       |
| O(1)-Gd(2)-O(8)#1 | 76.69(11)      | O(1)-Tb(2)-N(2)   | 150.82(9)      | O(1)-Dy(2)-O(8)#1 | 76.44(9)       |
| O(1)-Gd(2)-N(2)   | 151.17(13)     | O(2)-Tb(2)-O(8)#1 | 120.96(8)      | O(1)-Dy(2)-N(2)   | 150.93(10)     |
| O(2)-Gd(2)-O(8)#1 | 120.64(11)     | O(5)-Tb(2)-O(2)   | 126.99(8)      | O(2)-Dy(2)-O(8)#1 | 121.43(9)      |
| O(5)-Gd(2)-O(2)   | 127.31(11)     | O(5)-Tb(2)-O(8)#1 | 76.50(8)       | O(5)-Dy(2)-O(2)   | 126.88(9)      |
| O(5)-Gd(2)-O(8)#1 | 76.77(11)      | O(5)-Tb(2)-N(2)   | 77.27(9)       | O(5)-Dy(2)-O(8)#1 | 76.11(8)       |
| O(5)-Gd(2)-N(2)   | 77.00(13)      | O(7)#1-Tb(2)-O(1) | 89.15(8)       | O(5)-Dy(2)-N(2)   | 77.62(10)      |
| O(7)-Gd(2)-O(1)   | 138.07(12)     | O(7)-Tb(2)-O(1)   | 138.08(8)      | O(7)-Dy(2)-O(1)   | 138.07(9)      |
| O(7)-Gd(2)-O(2)   | 75.87(12)      | O(7)#1-Tb(2)-O(2) | 74.22(9)       | O(7)#1-Dy(2)-O(2) | 74.38(9)       |

|                     |                |                     |                |                     |                |
|---------------------|----------------|---------------------|----------------|---------------------|----------------|
| O(7)#1-Gd(2)-O(2)   | 73.95(12)      | O(7)-Tb(2)-O(2)     | 75.73(9)       | O(7)-Dy(2)-O(2)     | 75.52(9)       |
| O(7)-Gd(2)-O(5)     | 146.00(12)     | O(7)-Tb(2)-O(5)     | 146.76(8)      | O(7)-Dy(2)-O(5)     | 147.05(9)      |
| O(7)#1-Gd(2)-O(5)   | 138.09(11)     | O(7)#1-Tb(2)-O(5)   | 137.70(8)      | O(7)#1-Dy(2)-O(5)   | 137.43(9)      |
| O(7)-Gd(2)-O(7)#1   | 66.35(14)      | O(7)-Tb(2)-O(7)#1   | 66.09(10)      | O(7)-Dy(2)-O(7)#1   | 66.22(10)      |
| O(7)#1-Gd(2)-O(8)#1 | 61.90(11)      | O(7)#1-Tb(2)-O(8)#1 | 61.85(8)       | O(7)#1-Dy(2)-O(8)#1 | 62.03(8)       |
| O(7)-Gd(2)-O(8)#1   | 115.29(11)     | O(7)-Tb(2)-O(8)#1   | 115.03(8)      | O(7)-Dy(2)-O(8)#1   | 115.26(9)      |
| O(7)-Gd(2)-N(2)     | 69.97(14)      | O(7)#1-Tb(2)-N(2)   | 113.93(9)      | O(7)-Dy(2)-N(2)     | 70.37(10)      |
| O(7)#1-Gd(2)-N(2)   | 113.92(13)     | O(7)-Tb(2)-N(2)     | 70.41(9)       | O(7)#1-Dy(2)-N(2)   | 113.84(10)     |
| O(9)-Gd(2)-O(1)     | 92.28(12)      | O(9)-Tb(2)-O(1)     | 92.48(9)       | O(9)-Dy(2)-O(1)     | 92.89(9)       |
| O(9)-Gd(2)-O(2)     | 71.67(12)      | O(9)-Tb(2)-O(2)     | 71.79(9)       | O(9)-Dy(2)-O(2)     | 71.77(9)       |
| O(9)-Gd(2)-O(5)     | 79.03(12)      | O(9)-Tb(2)-O(5)     | 78.92(9)       | O(9)-Dy(2)-O(5)     | 79.06(9)       |
| O(9)-Gd(2)-O(7)     | 87.72(12)      | O(9)-Tb(2)-O(7)     | 88.16(9)       | O(9)-Dy(2)-O(7)     | 87.96(9)       |
| O(9)-Gd(2)-O(7)#1   | 141.02(12)     | O(9)-Tb(2)-O(7)#1   | 141.45(9)      | O(9)-Dy(2)-O(7)#1   | 141.57(9)      |
| O(9)-Gd(2)-O(8)#1   | 155.34(12)     | O(9)-Tb(2)-O(8)#1   | 155.05(8)      | O(9)-Dy(2)-O(8)#1   | 154.87(9)      |
| O(9)-Gd(2)-N(2)     | 80.60(14)      | O(9)-Tb(2)-N(2)     | 80.50(10)      | O(9)-Dy(2)-N(2)     | 80.36(11)      |
| N(2)-Gd(2)-O(2)     | 136.43(13)     | N(2)-Tb(2)-O(2)     | 136.50(9)      | N(2)-Dy(2)-O(2)     | 136.27(10)     |
| N(2)-Gd(2)-O(8)#1   | 98.39(13)      | N(2)-Tb(2)-O(8)#1   | 98.07(10)      | N(2)-Dy(2)-O(8)#1   | 97.86(10)      |
| <b>4</b>            | <b>Angle/°</b> | <b>4</b>            | <b>Angle/°</b> | <b>4</b>            | <b>Angle/°</b> |
| O(1)-Ho(1)-O(5)     | 72.99(9)       | O(1)-Ho(1)-O(6)     | 138.9(10)      | O(1)-Ho(1)-O(10)    | 84.35(10)      |
| O(1)-Ho(1)-O(11)    | 134.23(10)     | O(1)-Ho(1)-O(5)     | 72.99(9)       | O(1)-Ho(1)-O(6)     | 138.90(10)     |
| O(1)-Ho(1)-O(12)    | 86.77(11)      | O(1)-Ho(1)-N(1)     | 75.53(11)      | O(3)-Ho(1)-O(1)     | 127.85(11)     |
| O(3)-Ho(1)-O(5)     | 145.96(11)     | O(3)-Ho(1)-O(6)     | 84.75(11)      | O(3)-Ho(1)-O(10)    | 79.20(11)      |
| O(3)-Ho(1)-O(11)    | 76.43(11)      | O(3)-Ho(1)-O(12)    | 123.93(11)     | O(3)-Ho(1)-N(1)     | 73.87(11)      |
| O(5)-Ho(1)-O(6)     | 67.02(9)       | O(5)-Ho(1)-O(11)    | 109.35(10)     | O(5)-Ho(1)-O(12)    | 78.63(10)      |
| O(5)-Ho(1)-N(1)     | 140.03(11)     | O(6)-Ho(1)-O(11)    | 70.66(10)      | O(6)-Ho(1)-O(12)    | 94.25(11)      |
| O(6)-Ho(1)-N(1)     | 144.34(11)     | O(10)-Ho(1)-O(5)    | 76.59(10)      | O(10)-Ho(1)-O(6)    | 77.73(11)      |
| O(10)-Ho(1)-O(11)   | 141.39(11)     | O(10)-Ho(1)-O(12)   | 155.15(11)     | O(10)-Ho(1)-N(1)    | 123.99(11)     |
| O(12)-Ho(1)-O(11)   | 51.27(11)      | O(12)-Ho(1)-N(1)    | 75.60(12)      | N(1)-Ho(1)-O(11)    | 76.69(11)      |
| O(1)-Ho(2)-O(2)     | 65.38(10)      | O(1)-Ho(2)-O(5)     | 73.48(10)      | O(1)-Ho(2)-O(7)#1   | 88.39(10)      |
| O(1)-Ho(2)-O(8)#1   | 76.51(10)      | O(1)-Ho(2)-N(2)     | 150.76(11)     | O(2)-Ho(2)-O(8)#1   | 122.11(10)     |
| O(5)-Ho(2)-O(2)     | 127.19(10)     | O(5)-Ho(2)-O(8)#1   | 75.50(10)      | O(5)-Ho(2)-N(2)     | 77.31(11)      |
| O(7)-Ho(2)-O(1)     | 137.84(10)     | O(7)-Ho(2)-O(2)     | 75.12(10)      | O(7)#1-Ho(2)-O(2)   | 74.12(10)      |
| O(7)-Ho(2)-O(5)     | 147.18(10)     | O(7)#1-Ho(2)-O(5)   | 137.19(10)     | O(7)-Ho(2)-O(7)#1   | 66.46(12)      |
| O(7)#1-Ho(2)-O(8)#1 | 62.50(10)      | O(7)-Ho(2)-O(8)#1   | 115.54(10)     | O(7)-Ho(2)-N(2)     | 70.75(12)      |
| O(7)#1-Ho(2)-N(2)   | 114.66(12)     | O(9)-Ho(2)-O(1)     | 92.94(10)      | O(9)-Ho(2)-O(2)     | 71.54(10)      |
| O(9)-Ho(2)-O(7)     | 87.94(10)      | O(9)-Ho(2)-O(7)#1   | 141.40(10)     | O(9)-Ho(2)-O(8)#1   | 154.52(10)     |
| O(9)-Ho(2)-N(2)     | 80.19(12)      | N(2)-Ho(2)-O(2)     | 135.99(12)     | N(2)-Ho(2)-O(8)#1   | 97.64(12)      |
| <b>5</b>            | <b>Angle/°</b> | <b>5</b>            | <b>Angle/°</b> | <b>5</b>            | <b>Angle/°</b> |
| O(1)-Er(1)-O(5)     | 72.76(9)       | O(1)-Er(1)-O(6)     | 138.85(9)      | O(1)-Er(1)-O(10)    | 84.24(10)      |

|                   |            |                     |            |                   |            |
|-------------------|------------|---------------------|------------|-------------------|------------|
| O(1)-Er(1)-O(11)  | 134.56(10) | O(1)-Er(1)-O(12)    | 86.88(10)  | O(1)-Er(1)-N(1)   | 75.87(10)  |
| O(3)-Er(1)-O(1)   | 128.17(10) | O(3)-Er(1)-O(5)     | 145.47(10) | O(3)-Er(1)-O(6)   | 84.16(10)  |
| O(3)-Er(1)-O(10)  | 78.79(10)  | O(3)-Er(1)-O(11)    | 76.26(10)  | O(3)-Er(1)-O(12)  | 124.30(10) |
| O(3)-Er(1)-N(1)   | 74.47(11)  | O(5)-Er(1)-O(6)     | 67.24(9)   | O(5)-Er(1)-O(11)  | 109.70(10) |
| O(5)-Er(1)-O(12)  | 78.55(10)  | O(5)-Er(1)-N(1)     | 139.93(10) | O(6)-Er(1)-O(11)  | 70.65(10)  |
| O(6)-Er(1)-O(12)  | 94.25(11)  | O(6)-Er(1)-N(1)     | 144.04(10) | O(10)-Er(1)-O(5)  | 76.59(10)  |
| O(10)-Er(1)-O(6)  | 77.67(10)  | O(10)-Er(1)-O(11)   | 141.18(10) | O(10)-Er(1)-O(12) | 155.08(10) |
| O(10)-Er(1)-N(1)  | 124.31(11) | O(12)-Er(1)-O(11)   | 51.57(10)  | O(12)-Er(1)-N(1)  | 75.43(11)  |
| N(1)-Er(1)-O(11)  | 76.30(11)  | O(1)-Er(2)-O(2)     | 65.43(9)   | O(1)-Er(2)-O(5)   | 73.41(9)   |
| O(1)-Er(2)-O(7)#1 | 88.60(10)  | O(1)-Er(2)-O(8)#1   | 76.82(9)   | O(1)-Er(2)-N(2)   | 151.00(11) |
| O(2)-Er(2)-O(8)#1 | 122.45(9)  | O(5)-Er(2)-O(2)     | 127.27(9)  | O(5)-Er(2)-O(8)#1 | 75.27(9)   |
| O(5)-Er(2)-N(2)   | 77.63(11)  | O(7)-Er(2)-O(1)     | 137.73(10) | O(7)-Er(2)-O(2)   | 74.96(10)  |
| O(7)#1-Er(2)-O(2) | 74.19(10)  | O(7)-Er(2)-O(5)     | 147.38(10) | O(7)#1-Er(2)-O(5) | 137.14(9)  |
| O(7)-Er(2)-O(7)#1 | 66.24(12)  | O(7)#1-Er(2)-O(8)#1 | 62.70(9)   | O(7)-Er(2)-O(8)#1 | 115.46(9)  |
| O(7)-Er(2)-N(2)   | 70.62(11)  | O(7)#1-Er(2)-N(2)   | 114.29(11) | O(9)-Er(2)-O(1)   | 92.77(10)  |
| O(9)-Er(2)-O(2)   | 71.29(10)  | O(9)-Er(2)-O(5)     | 79.56(10)  | O(9)-Er(2)-O(7)   | 87.92(10)  |
| O(9)-Er(2)-O(7)#1 | 141.19(10) | O(9)-Er(2)-O(8)#1   | 154.58(10) | O(9)-Er(2)-N(2)   | 80.46(11)  |
| N(2)-Er(2)-O(2)   | 135.78(11) | N(2)-Er(2)-O(8)#1   | 97.37(11)  |                   |            |

Symmetry transformation: #1 -X, 2-Y, 1-Z for **1**, #1 2-X, -Y, 1-Z for **2-5**

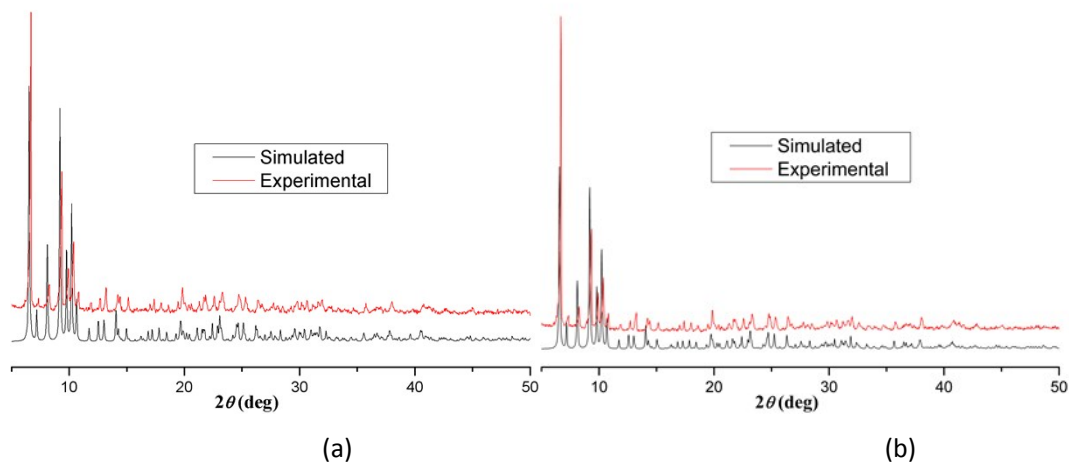

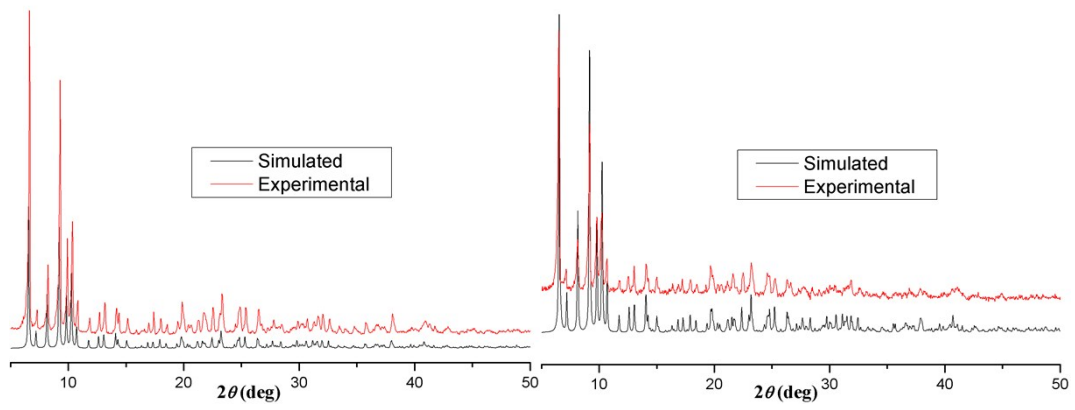

(c)

(d)

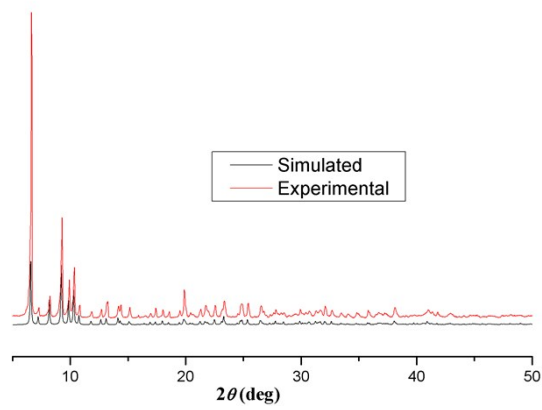

(e)

Fig. S4 PXR D patterns of 1(a), 2(b), 3(c), 4(d), 5(e).

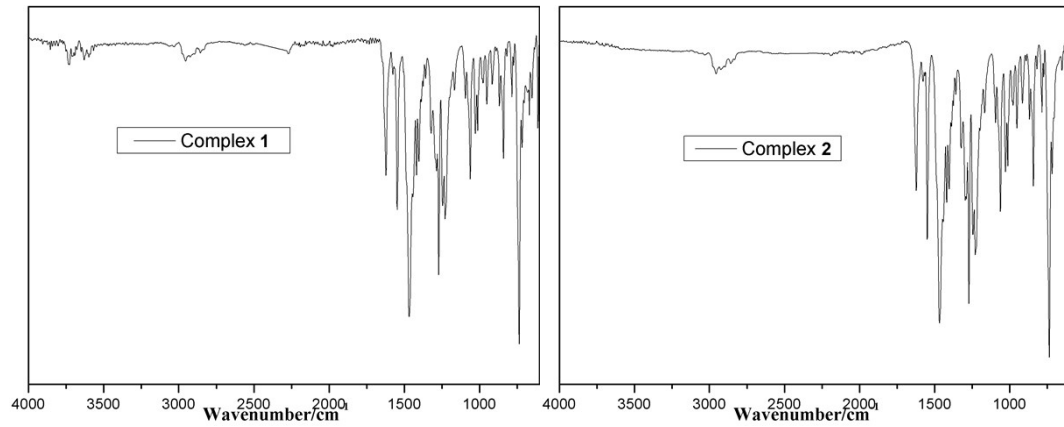

(a)

(b)

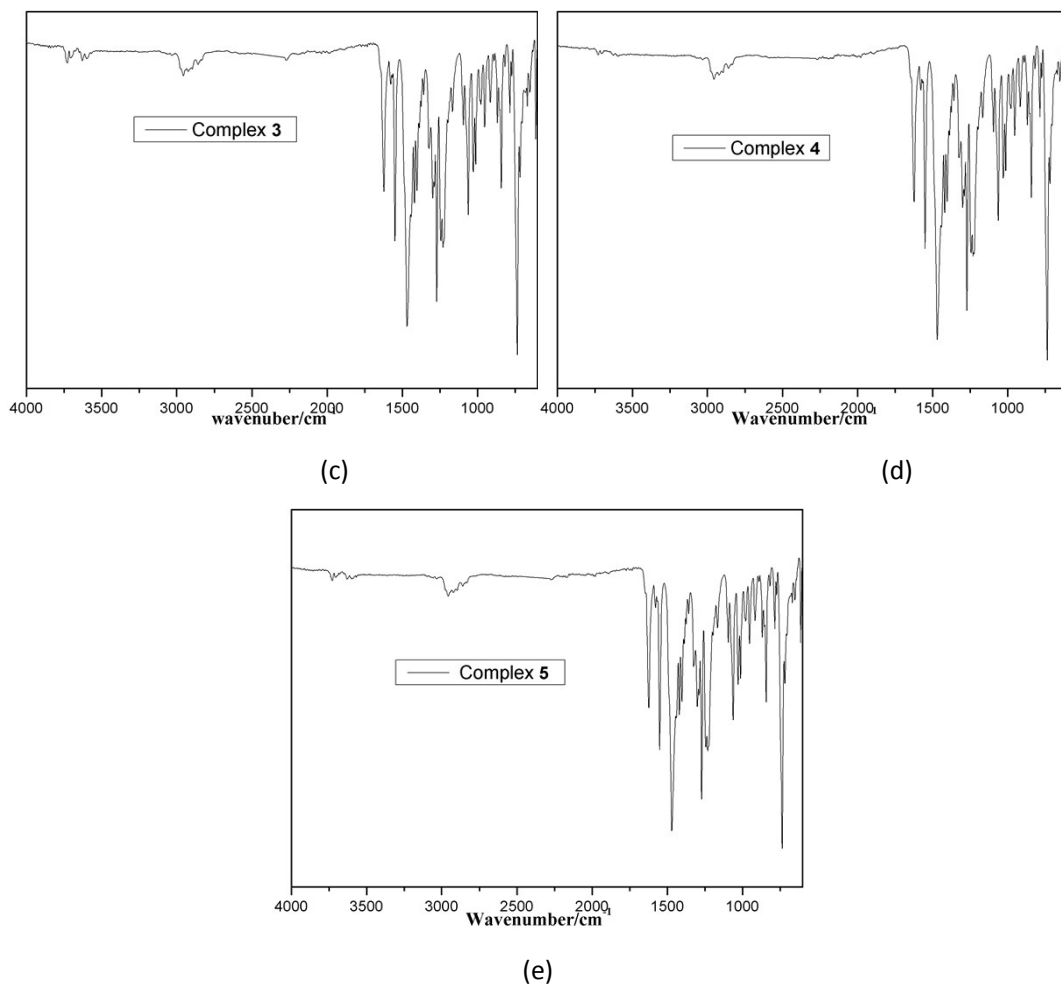

Fig. S5 IR spectra of 1(a), 2(b), 3(c), 4(d), 5(e).

**Table S2.** Agreement factor between the coordination polyhedron of the Ln<sup>III</sup> and the various ideal polyhedral calculated by the SHAPE program

|          | HBPY-8                          | CU-8    | SAPR-8 | TDD-8  | JGBF-8  | JBTPR-8 | BTPR-8 | JSD-8 | TT-8   |
|----------|---------------------------------|---------|--------|--------|---------|---------|--------|-------|--------|
| Gd1      | 14.779,                         | 8.898,  | 1.686, | 2.836, | 14.348, | 2.716,  | 1.948  | 5.147 | 9.501, |
| Gd2,     | 14.482,                         | 11.904, | 3.123, | 2.877, | 11.858, | 2.745,  | 2.428  | 4.685 | 12.131 |
| Tb1      | 14.941,                         | 8.967,  | 1.635, | 2.787, | 14.521, | 2.674,  | 1.858  | 5.070 | 9.572  |
| Tb2      | 14.587,                         | 11.972, | 3.095, | 2.913, | 11.953, | 2.721,  | 2.435  | 4.625 | 12.156 |
| Dy1,     | 15.029,                         | 9.008,  | 1.635, | 2.709, | 14.552, | 2.604,  | 1.787  | 4.952 | 9.590  |
| Dy2,     | 14.735,                         | 12.056, | 3.038, | 2.904, | 12.026, | 2.668,  | 2.416  | 4.549 | 12.224 |
| Ho1      | 15.177,                         | 9.091,  | 1.567, | 2.688, | 14.556, | 2.534,  | 1.741, | 4.917 | 9.670  |
| Ho2,     | 14.872,                         | 12.189, | 2.967, | 2.924, | 11.996, | 2.572,  | 2.313  | 4.515 | 12.306 |
| Er1      | 15.298,                         | 9.127,  | 1.525, | 2.645, | 14.588, | 2.447,  | 1.685  | 4.823 | 9.686  |
| Er2      | 14.918                          | 12.242  | 2.990  | 2.925  | 12.031  | 2.566   | 2.323  | 4.478 | 12.406 |
| 1 HBPY-8 | Hexagonal bipyramid             |         |        |        | D6h     |         |        |       |        |
| 2 CU-8   | Cube                            |         |        |        | Oh      |         |        |       |        |
| 3 SAPR-8 | Square antiprism                |         |        |        | D4d     |         |        |       |        |
| 4 TDD-8  | Triangular dodecahedron         |         |        |        | D2d     |         |        |       |        |
| 5 JGBF-8 | Johnson – Gyrobifastigium (J26) |         |        |        | D2d     |         |        |       |        |



|          |                                            |     |
|----------|--------------------------------------------|-----|
| 6 JBTP-8 | Johnson – Biaugmented trigonal prism (J50) | C2v |
| 7 BTPR-8 | Biaugmented trigonal prism                 | C2v |
| 8 JSD-8  | Snub disphenoid (J84)                      | D2d |
| 9 TT-8   | Triakis tetrahedron                        | Td  |

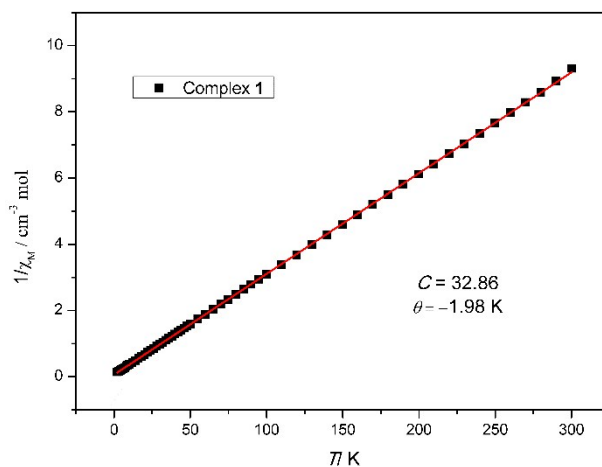

Fig. S6 Plot of  $1/\chi_M$  versus  $T$  for **1**, the linear fit is the Curie-Weiss law fit at 1 kOe field.

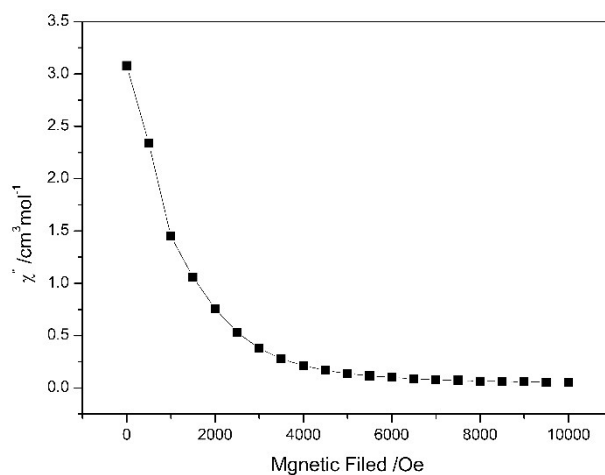

Fig. S7 Temperature dependence of the out-of-phase ( $\chi''$ ) ac susceptibility for **3** under zero dc field at 1000

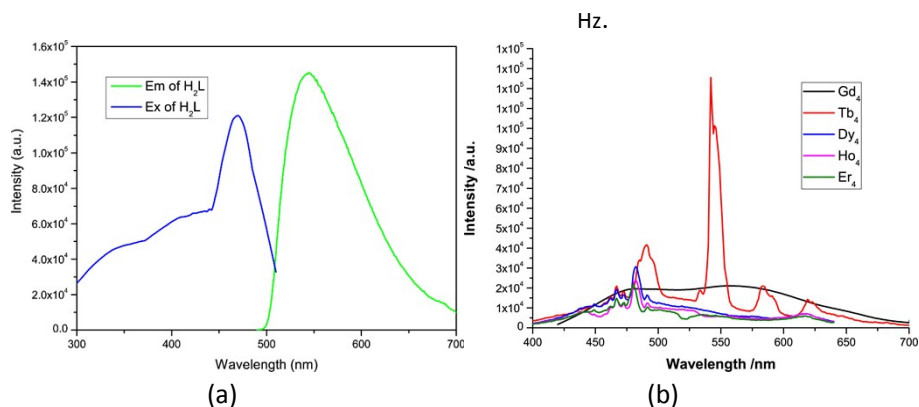

Fig. S8 (a) The excitation and emission spectra of  $H_2L$  ligand. (b) Emission spectra of **1-5** in solid state at room temperature.

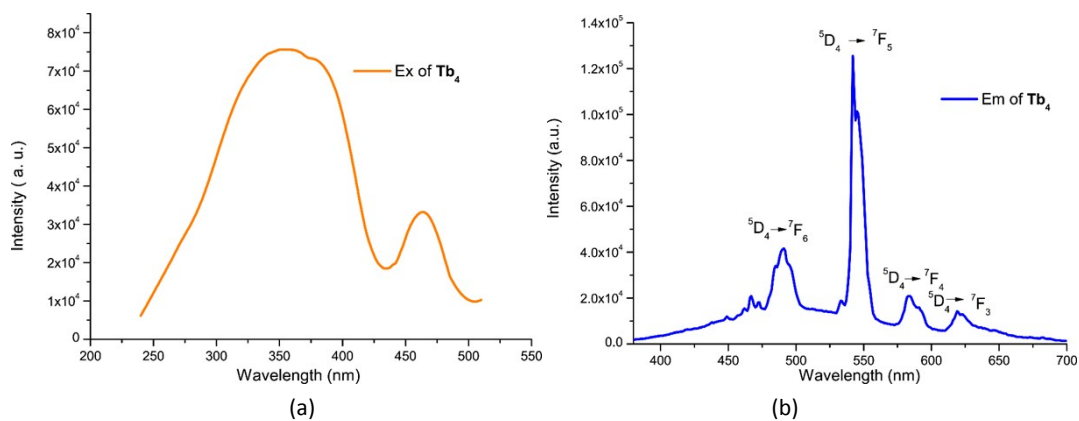

Fig. S9 Excitation spectrum (a) and emission spectrum (b) of **2** in solid state at room temperature.

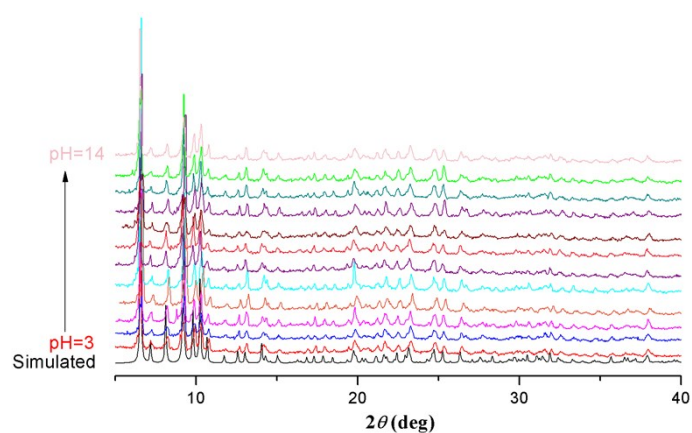

Fig. S10 PXRD patterns for the simulated and experimental samples of **2** soaked in aqueous solutions with pH values in the range of 3-14 for two days.

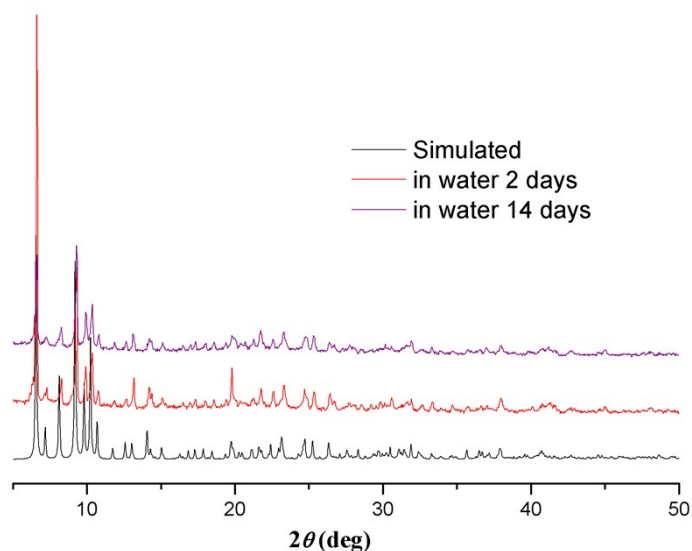

Fig. S11 PXRD patterns for the simulated and experimental samples of **2** soaked in water for 2 days and 14 days.

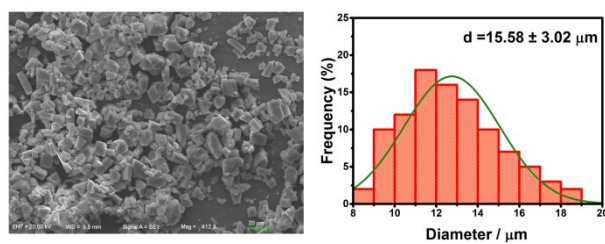

(a)

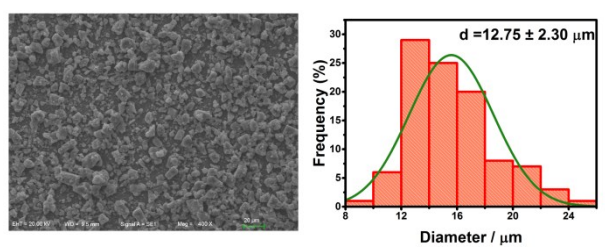

(b)

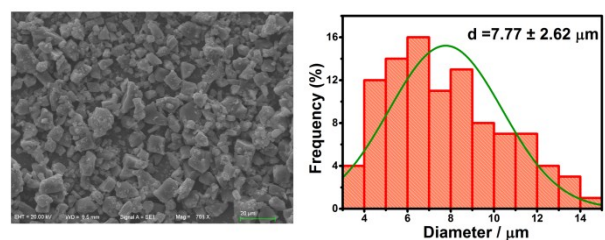

(c)

**Fig. S12** SEM images (left) and particle size distributions of **2** (right) after being sonicated for 8 (a), 15 (b) and 30 (c) minutes.

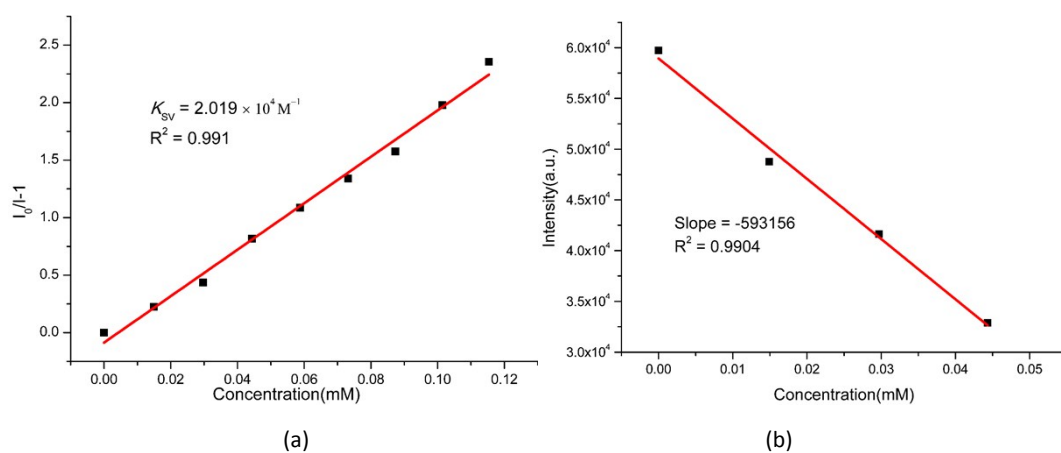

**Fig. S13** (a) Stern-Volmer plot of  $I_0/I-1$  versus low  $\text{Fe}^{3+}$  concentration in the aqueous suspension of **2**. (b) Linear region of fluorescence intensity for the suspensions of **2** in water upon incremental addition of  $\text{Fe}^{3+}$  solutions.

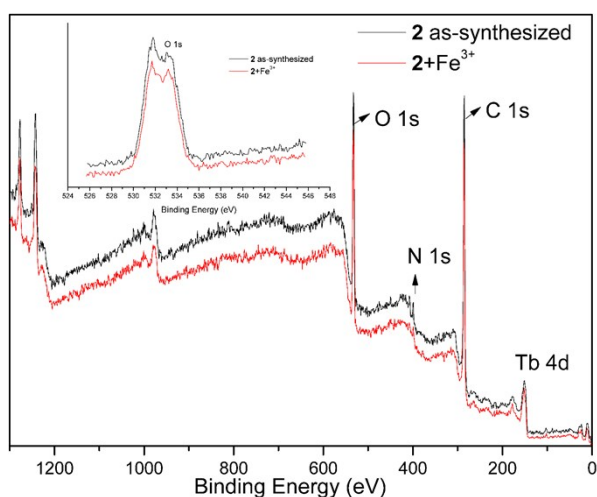

Fig. S14 Comparison of XPS spectra of **2** before (black) and after (red) its immersion in the  $\text{Fe}^{3+}$  aqueous solution.

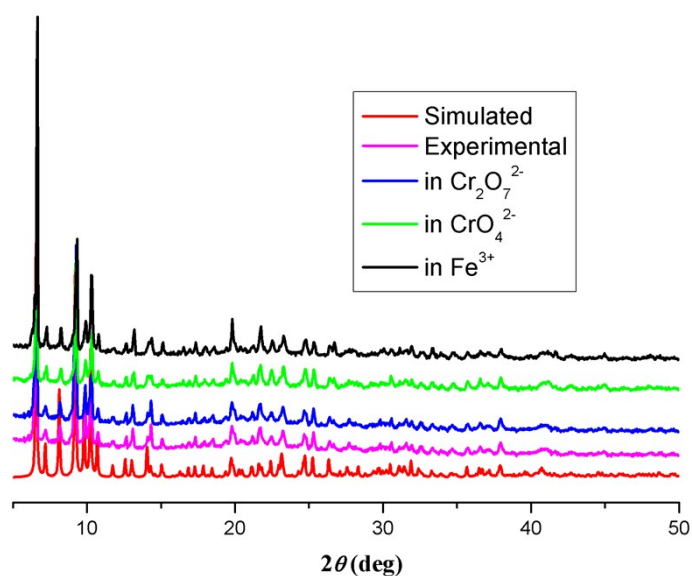

Fig. S15 PXRD patterns for **2** after the detection of  $\text{Fe}^{3+}$ ,  $\text{CrO}_4^{2-}$  and  $\text{Cr}_2\text{O}_7^{2-}$  ions.

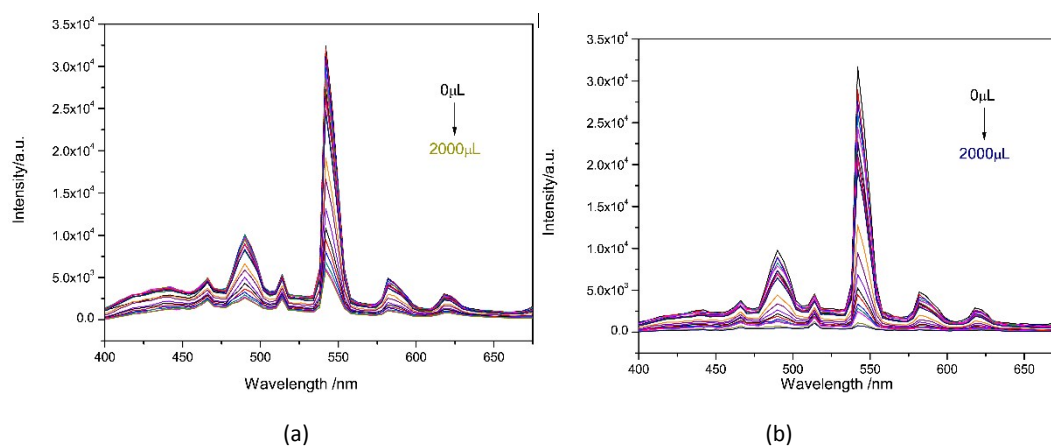

Fig. S16 Luminescent responses of a water suspension of **2** (2 mg/2 mL) towards different concentrations of (a)  $\text{CrO}_4^{2-}$  ions ( $2 \times 10^{-3}$  M, 0  $\mu\text{L}$ -2000  $\mu\text{L}$ ) and (b)  $\text{Cr}_2\text{O}_7^{2-}$  ( $2 \times 10^{-3}$  M, 0  $\mu\text{L}$ -2000  $\mu\text{L}$ ).

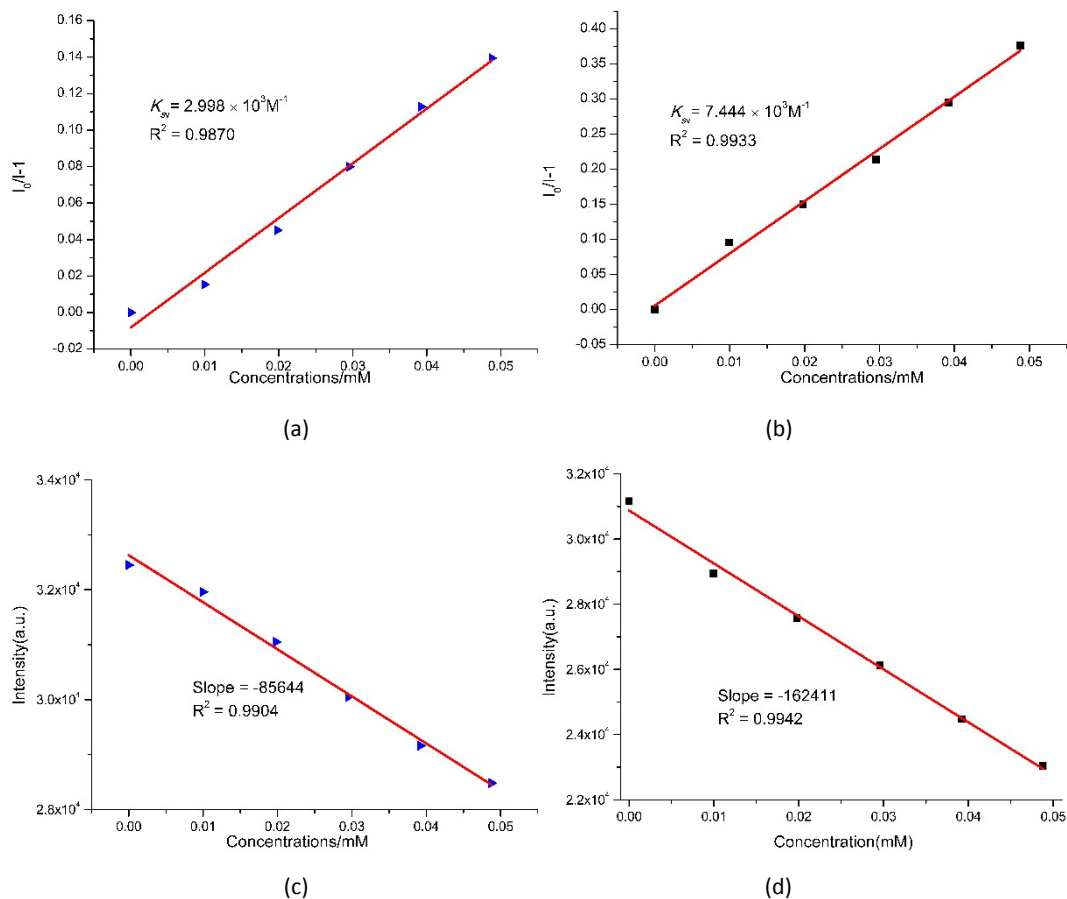

**Fig. S17** Stern-Volmer plot of  $I_0/I-1$  versus low concentration of  $\text{CrO}_4^{2-}$  (a) and  $\text{Cr}_2\text{O}_7^{2-}$  (b) in the aqueous suspension of **2**, and linear region of fluorescence intensity for the suspensions of **2** in water upon incremental addition of  $\text{CrO}_4^{2-}$  (c) or  $\text{Cr}_2\text{O}_7^{2-}$  (d) solutions.

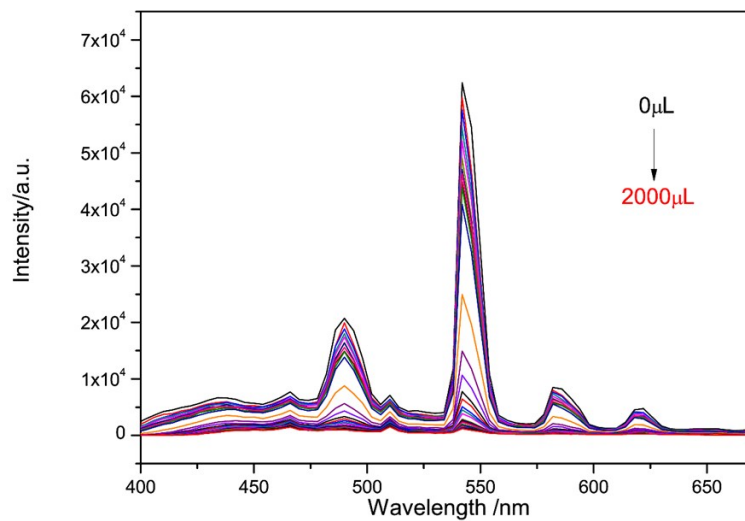

**Fig. S18** Luminescence responses of an ethanol suspension of **2** (2 mg/2 mL) towards different concentrations of 4-NA ( $1 \times 10^{-3}$  M, 0  $\mu\text{L}$ -2000  $\mu\text{L}$ ).

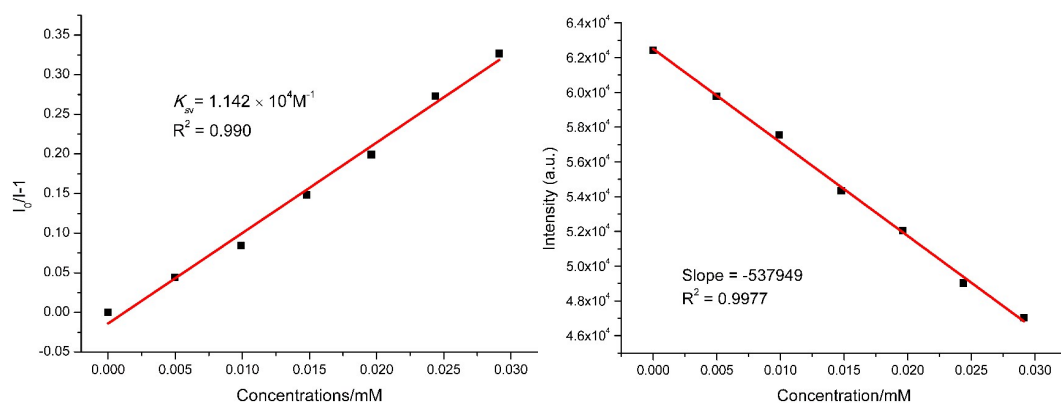

**Fig. S19** (a) Stern-Volmer plot of  $I_0/I-1$  versus low concentration of 4-NA in the ethanol suspension of **2**. (b) Linear region of fluorescence intensity for the suspensions of **2** in ethanol upon incremental addition of 4-NA solutions.

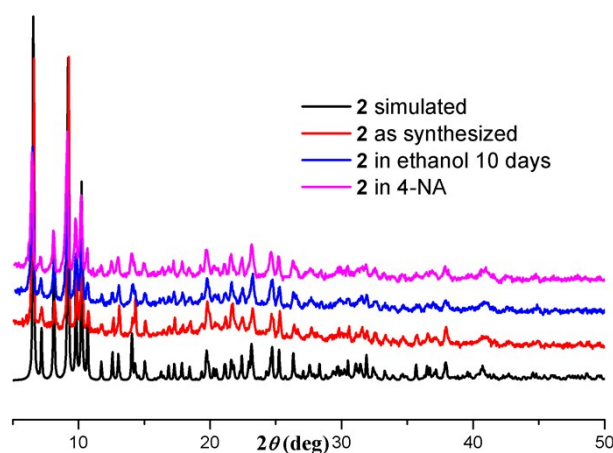

**Fig. S20** PXRD patterns for **2** after the detection of 4-NA and being soaked in ethanol for 10 days

**Table S3** The comparison of various Ln-complexes fluorescent sensors for  $\text{Fe}^{3+}$ ,  $\text{CrO}_4^{2-}$  and  $\text{Cr}_2\text{O}_7^{2-}$

| Ln based complexes                                                                                                 | Analyte                      | Quenching constant<br>( $K_{sv}$ , $\text{M}^{-1}$ ) | Detection<br>limits | Solvent | Ref          |
|--------------------------------------------------------------------------------------------------------------------|------------------------------|------------------------------------------------------|---------------------|---------|--------------|
| [ $\text{Tb}_4\text{L}_4(\text{NO}_3)_2(\text{Piv})_4$ ] $\cdot 2\text{CH}_3\text{OH}$                             | $\text{Fe}^{3+}$             | $1.86 \times 10^4$                                   | 10 $\mu\text{M}$    | water   | This<br>work |
|                                                                                                                    | $\text{CrO}_4^{2-}$          | $2.998 \times 10^3$                                  | 52 $\mu\text{M}$    |         |              |
|                                                                                                                    | $\text{Cr}_2\text{O}_7^{2-}$ | $7.44 \times 10^3$                                   | 27 $\mu\text{M}$    |         |              |
| {[ $\text{Tb}_2(\text{Ccbp})_3 \cdot 6\text{H}_2\text{O}$ ] $\cdot 3\text{Cl}^- \cdot 4\text{H}_2\text{O}$ }       | $\text{Fe}^{3+}$             | $1.143 \times 10^5$                                  |                     | ethanol | 1            |
| {[ $\text{Eu}(\text{L1})(\text{BPDC})_{1/2}(\text{NO}_3)] \cdot \text{H}_3\text{O}$ ] $_n$ }                       | $\text{Fe}^{3+}$             | $5.16 \times 10^4$                                   |                     | DMF     | 2            |
| {[ $\text{Tb}(\text{L1})(\text{BPDC})_{1/2}(\text{NO}_3)] \cdot \text{H}_3\text{O}$ ] $_n$ }                       | $\text{Fe}^{3+}$             | $4.30 \times 10^4$                                   |                     | DMF     | 2            |
| {[ $\text{Eu}(1,5\text{-Nds})_{0.5}(\text{ox})(\text{phen})(\text{H}_2\text{O}) \cdot \text{H}_2\text{O}$ ] $_n$ } | $\text{Fe}^{3+}$             |                                                      |                     | water   | 3            |
| {[ $\text{Eu}_2(\text{MFDA})_2(\text{HCOO})_2(\text{H}_2\text{O})_6 \cdot \text{H}_2\text{O}$ ] $_n$ }             | $\text{Fe}^{3+}$             |                                                      | 0.33 $\mu\text{M}$  | DMF     | 4            |
| [( $\text{CH}_3$ ) $_2\text{NH}_2$ ] $\cdot [\text{Tb}(\text{bptc})] \cdot \text{xsolvents}$                       | $\text{Fe}^{3+}$             |                                                      | 18.01 $\mu\text{M}$ | ethanol | 5            |
| [ $\text{Tb}(\text{TBOT})(\text{H}_2\text{O})](\text{H}_2\text{O})_4(\text{DMF})(\text{NMP})_{0.5}$ ]              | $\text{Fe}^{3+}$             | $5.51 \times 10^3$                                   | 130 $\mu\text{M}$   | water   | 6            |
|                                                                                                                    | $\text{Cr}_2\text{O}_7^{2-}$ | $1.37 \times 10^4$                                   | 340 $\mu\text{M}$   |         |              |
| [ $\text{Eu}(\text{L2})(\text{HCOO})(\text{H}_2\text{O})$ ] $_n$ }                                                 | $\text{CrO}_4^{2-}$          | $1.5374 \times 10^3$                                 | 1.2 $\mu\text{M}$   | Water   | 7            |
|                                                                                                                    | $\text{Cr}_2\text{O}_7^{2-}$ | $2.7626 \times 10^3$                                 | 1.0 $\mu\text{M}$   |         |              |
| [ $\text{Tb}(\text{L2})(\text{HCOO})(\text{H}_2\text{O})$ ] $_n$ }                                                 | $\text{CrO}_4^{2-}$          | $1.3070 \times 10^3$                                 | 1.8 $\mu\text{M}$   | Water   | 7            |
|                                                                                                                    | $\text{Cr}_2\text{O}_7^{2-}$ | $2.1335 \times 10^3$                                 | 2.1 $\mu\text{M}$   |         |              |

|                                                                                               |                                              |                        |          |         |    |
|-----------------------------------------------------------------------------------------------|----------------------------------------------|------------------------|----------|---------|----|
| [Eu <sub>2</sub> (tpbpc) <sub>4</sub> ·CO <sub>3</sub> ·4H <sub>2</sub> O]·DMF·solvent        | CrO <sub>4</sub> <sup>2-</sup>               | 4.85×10 <sup>3</sup>   | 0.33 ppm | water   | 8  |
|                                                                                               | Cr <sub>2</sub> O <sub>7</sub> <sup>2-</sup> | 1.04×10 <sup>4</sup>   | 1.07 ppm |         |    |
| {[Eu <sub>2</sub> (L3) <sub>1.5</sub> (H <sub>2</sub> O) <sub>2</sub> EtOH]·DMF} <sub>n</sub> | Fe <sup>3+</sup>                             | 2.942×10 <sup>3</sup>  | 10 μM    | DMF     | 9  |
|                                                                                               | Cr <sub>2</sub> O <sub>7</sub> <sup>2-</sup> | 1.526×10 <sup>3</sup>  | 10 μM    |         |    |
| {[Tb(TATAB)(H <sub>2</sub> O) <sub>2</sub> ]·NMP·H <sub>2</sub> O} <sub>n</sub>               | Fe <sup>3+</sup>                             | 3667                   | 1 μM     | water   | 10 |
|                                                                                               | Cr <sub>2</sub> O <sub>7</sub> <sup>2-</sup> | 11106                  | 5 μM     |         |    |
| [Eu(Hpzbc) <sub>2</sub> (NO <sub>3</sub> ) <sub>2</sub> ]·H <sub>2</sub> O                    | Cr <sub>2</sub> O <sub>7</sub> <sup>2-</sup> |                        | 22 μM    | ethanol | 11 |
| [Eu(HL4)(H <sub>2</sub> O) <sub>2</sub> (NO <sub>3</sub> ) <sub>2</sub> ]·NO <sub>3</sub>     | Fe <sup>3+</sup>                             | 4.03×10 <sup>4</sup>   | 43 μM    | water   | 12 |
|                                                                                               | Cr <sub>2</sub> O <sub>7</sub> <sup>2-</sup> | 7.52×10 <sup>4</sup>   | 17 μM    |         |    |
| [Tb(HL4)(H <sub>2</sub> O) <sub>2</sub> (NO <sub>3</sub> ) <sub>2</sub> ]·NO <sub>3</sub>     | Fe <sup>3+</sup>                             | 4.54×10 <sup>4</sup>   | 16 μM    | water   | 12 |
|                                                                                               | Cr <sub>2</sub> O <sub>7</sub> <sup>2-</sup> | 4.59 × 10 <sup>4</sup> | 25 μM    |         |    |
| [Eu(HPIDC)(m-bdc)·1.5H <sub>2</sub> O] <sub>n</sub>                                           | Cr <sub>2</sub> O <sub>7</sub> <sup>2-</sup> | 4.1 × 10 <sup>4</sup>  |          | water   | 13 |
| [Tb(HPIDC)(m-bdc)·1.5H <sub>2</sub> O] <sub>n</sub>                                           | Cr <sub>2</sub> O <sub>7</sub> <sup>2-</sup> | 6.1 × 10 <sup>3</sup>  |          | water   | 13 |

Ccbp<sup>-</sup> = 4-carboxy-1-(4-carboxybenzyl)pyridinium; H<sub>2</sub>L1 = 2,5-di(pyridin-4-yl)terephthalic acid, BPDC = biphenyl-4,4'-dicarboxylic acid; 1,5-Nds = 1,5-naphthalenedisulfonate disulfonate; ox = oxalate; phen = 1,10-phenanthroline; m-H<sub>2</sub>bdc = 1,3-benzenedicarboxylic acid; H<sub>4</sub>bzptc = benzophenone-3,3',4',4'-tetracarboxylic acid; H<sub>3</sub>PIDC = 2-(4-pyridyl)-1H-imidazole-4,5-dicarboxylic acid; H<sub>2</sub>MFDA = 9,9-dimethyl-fluorene-2,7-dicarboxylic acid; H<sub>4</sub>bptc = tetracarboxylic acid; NMP = N-methyl-2-pyrrolidone; H<sub>3</sub>TBOT (2,4,6-tris[1-(3-carboxylphenoxy)ylmethyl]mesitylene); H<sub>2</sub>L = 5-((2'-cyano-[1,1'-biphenyl]-4-yl)methoxy)isophthalic acid; H<sub>2</sub>L3 = 5,5'-(carbonylbis(azanediyl))diisophthalic acid; Htpbpc = 4'-[4,2',6',4'']-terpyridin-4'-yl-biphenyl-4-carboxylic acid; H<sub>3</sub>TATAB = 4,4',4'-s-triazine-1,3,5-triyltri-*p*-aminobenzoate acid; H<sub>2</sub>pzbc = 3-(1H-pyrazol-3-yl) benzoic acid; H<sub>3</sub>DMPHIDC = 2-(3,4-dimethylphenyl)-1H-imidazole-4,5-dicarboxylic acid; H<sub>3</sub>TATAB = 4,4',4'-s-triazine-1,3,5-triyltri-*m*-aminobenzoic acid; H<sub>3</sub>PIDC = 2-(4-pyridyl)-1H-imidazole-4,5-dicarboxylic acid; m-H<sub>2</sub>bdc = 1,3-benzenedicarboxylic acid; DMF = N,N-dimethylformamide

**Table S4** The comparison of various coordination complexes fluorescent sensors for 4-NA

| Coordination complex                                                                                         | Quenching constant (K <sub>SV</sub> , M <sup>-1</sup> ) | Detection limits | λ <sub>ex</sub> (nm) | λ <sub>em</sub> (nm)         | Solvent     | Ref       |
|--------------------------------------------------------------------------------------------------------------|---------------------------------------------------------|------------------|----------------------|------------------------------|-------------|-----------|
| [Tb <sub>4</sub> L <sub>4</sub> (NO <sub>3</sub> ) <sub>2</sub> (Piv) <sub>4</sub> ]·2CH <sub>3</sub> OH     | 1.14 × 10 <sup>4</sup>                                  | 8.5 μM           | 360                  | 544                          | ethanol     | This work |
| [Cd <sub>1/2</sub> (L5) <sub>1/3</sub> (bib) <sub>1/2</sub> (H <sub>2</sub> O)] <sub>n</sub>                 | 6.6 × 10 <sup>4</sup>                                   |                  |                      | 325                          | DMSO        | 14        |
| {[Cd <sub>1/2</sub> (HL5) <sub>2</sub> (bibp) <sub>2</sub> ]·3H <sub>2</sub> O} <sub>n</sub>                 | 1.1 × 10 <sup>4</sup>                                   |                  |                      | 375                          | DMSO        | 14        |
| [Cd <sub>2</sub> (H <sub>2</sub> L6) <sub>2</sub> (H <sub>2</sub> O) <sub>5</sub> ]·5H <sub>2</sub> O·2DMF   | 1.81 × 10 <sup>4</sup>                                  |                  | 340                  | 480                          | isopropanol | 15        |
| {[Zn <sub>4</sub> (μ <sub>3</sub> -OH) <sub>2</sub> (L7)(H <sub>2</sub> O) <sub>2</sub> ]·2DMF} <sub>n</sub> |                                                         |                  | 350                  | 400 red-shifted about 40 nm. | DMF         | 16        |
| [Zn(L8) <sub>0.5</sub> (1,10-phen)(H <sub>2</sub> O)]·2H <sub>2</sub> O                                      | 6556                                                    |                  | 330                  | 456                          | DMA         | 17        |
| [Zn(L8) <sub>0.5</sub> (1,10-phen)(H <sub>2</sub> O)]·2H <sub>2</sub> O                                      | 3955                                                    |                  | 318                  | 396                          | DMA         | 17        |

H<sub>3</sub>L5 = tris(*p*-carboxyphenyl)phosphane oxide; bib = 1,4-bis(imidazol-1-yl)benzene bibp = 4,4'-bis(imidazol-1-yl)biphenyl; H<sub>4</sub>L6 = 2,5-bis-(3,5-dicarboxyphenyl)thiopheneamide; H<sub>6</sub>L7 = [1,1';4',1'']terphenyl-3,5,2',5',3'',5''-hexacarboxylic acid; H<sub>4</sub>L8 = bis-(3,5-dicarboxyphenyl)terephthalamide; DMA = N,N-dimethylacetamide; DMSO = dimethyl sulfoxide

## References

- S1. K.-M. Wang, L. Du, Y.-L. Ma, J.-S. Zhao, Q. Wang, T. Yan and Q.-H. Zhao, *CrystEngComm*, 2016, **18**, 2690-2700.
- S2. W. Yan, C. Zhang, S. Chen, L. Han and H. Zheng, *ACS Appl. Mater. Interfaces*, 2017, **9**, 1629-1634.
- S3. R. Li, X.-L. Qu, Y.-H. Zhang, H.-L. Han and X. Li, *CrystEngComm*, 2016, **18**, 5890-5900.
- S4. X. H. Zhou, L. Li, H. H. Li, A. Li and W. Huang, *Dalton Trans.*, 2013, **42**, 12403-12409.
- S5. X. L. Zhao, D. Tian, Q. Gao, H. W. Sun, J. Xu and X. H. Bu, *Dalton Trans.*, 2016, **45**, 1040-1046.
- S6. M. Chen, W. -M. Xu, J. -Y. Tian, H. Cui, J.-X. Zhang, C. -S. Liu and M. Du, *J. Mater. Chem. C*, 2017, **5**, 2015-2021.
- S7. Z. Sun, M. Yang, Y. Ma and L. Li, *Cryst. Growth Des.*, 2017, **17**, 4326-4335.
- S8. J. Liu, G. Ji, J. Xiao and Z. Liu, *Inorg. Chem.*, 2017, **56**, 4197-4205.
- S9. W. Liu, X. Huang, C. Xu, C. Chen, L. Yang, W. Dou, W. Chen, H. Yang and W. Liu, *Chem. –Eur. J.*, 2016, **22**, 18769-18776.
- S10. G. X. Wen, M. L. Han, X. Q. Wu, Y. P. Wu, W. W. Dong, J. Zhao, D. S. Li and L. F. Ma, *Dalton Trans.*, 2016, **45**, 15492-15499.
- S11. G. P. Li, G. Liu, Y. Z. Li, L. Hou, Y. Y. Wang and Z. Zhu, *Inorg. Chem.*, 2016, **55**, 3952-3959.
- S12. W. Gao, F. Liu, B. Y. Zhang, X. M. Zhang, J. P. Liu, E. Q. Gao and Q. Y. Gao, *Dalton Trans.*, 2017, **46**, 13878-13887.
- S13. X. H. Huang, L. Shi, S. M. Ying, G. Y. Yan, L. H. Liu, Y. Q. Sun and Y. P. Chen, *CrystEngComm*, 2018, **20**, 189-197.
- S14. L. Huo, J. Zhang, L. Gao, X. Wang, L. Fan, K. Fang and T. Hu, *CrystEngComm*, 2017, **19**, 5285-5292.
- S15. F. Wang, Z. Yu, C. Wang, K. Xu, J. Yu, J. Zhang, Y. Fu, X. Li and Y. Zhao, *Sen. Actuators B Chem.*, 2017, **239**, 688-695.
- S16. X.-Y. Wan, F.-L. Jiang, C.-P. Liu, K. Zhou, L. Chen, Y.-L. Gai, Y. Yang and M.-C. Hong, *J. Mater. Chem. A*, 2015, **3**, 22369-22376.
- S17. F. Wang, C. Wang, Z. Yu, Q. He, X. Li, C. Shang and Y. Zhao, *RSC Adv.*, 2015, **5**, 70086-70093.
